# Supplementary material for: Metabolic response of blood vessels to TNFα
Source: eLife. 2020 Aug 4;9:e54754. doi: 10.7554/eLife.54754 (PMC7476757; doi:10.7554/eLife.54754)
Supplement: Source data 1. [file elife-54754-data1.xlsx]

## Sheet: Calibration curves
Cal	PGF1a		PGF2a		PGF3a		PGE2		PGE1		PGD2		13, 14-dihydro-PGF2a		PGA2		8-iso-13, 14-dihydro-PGF2a		8-iso-PGF2a		8-iso-PGE2		8-iso-PGE1		5-iPF2a		8, 12-iPF2a IV		LPA C14_0		LPA C16_1		LPA C22_6		LPA C18_2		LPA C20_4		LPA C22_5		LPA C16_0		LPA C18_1		cLPA C20_4		LPA C18_0		cLPA C16_0
	Concentration (nM)	Area ratio	Concentration (nM)	Area ratio	Concentration (nM)	Area ratio	Concentration (nM)	Area ratio	Concentration (nM)	Area ratio	Concentration (nM)	Area ratio	Concentration (nM)	Area ratio	Concentration (nM)	Area ratio	Concentration (nM)	Area ratio	Concentration (nM)	Area ratio	Concentration (nM)	Area ratio	Concentration (nM)	Area ratio	Concentration (nM)	Area ratio	Concentration (nM)	Area ratio	Concentration (nM)	Area ratio	Concentration (nM)	Area ratio	Concentration (nM)	Area ratio	Concentration (nM)	Area ratio	Concentration (nM)	Area ratio	Concentration (nM)	Area ratio	Concentration (nM)	Area ratio	Concentration (nM)	Area ratio	Concentration (nM)	Area ratio	Concentration (nM)	Area ratio	Concentration (nM)
0	0	0	0	0	0	0	0	0	0	0	0	0			0	0	0	0	0	0	0	0	0	0	0	0	0	0													0	0					0	0
1	0.208333	0.00096715	0.208333	0.0180613	0.208333	0.000320447	0.208333	0.00866244	0.208333	0.000705423	0.208333	0.00119728	0	0	0.208333	0.000336525	0.208333	0.000948047	0.208333	0.000110794	0.208333	0.00742727	0.208333	0.0111588	0.208333	0.000487579	0.208333	0.00057564	NA	0	NA	0	NA	0	NA	0	0	0	NA	0	9.375	0.00348763	0	0	NA	0	10.4167	0.0101283	NA
2	0.416667	0.0297107	0.416667	0.0313497	0.416667	0.00465869	0.416667	0.084905	0.416667	0.100539	0.416667	0.0168376	0.3275	0.008781	0.416667	0.170369	0.416667	0.0162468	0.416667	0.0204744	0.416667	0.0724321	0.416667	0.160711	0.416667	0.0182077	0.416667	0.00114611	NA	3.17066e-05	NA	4.35147e-05	NA	0.00010684	NA	0.000408301	18.75	0.0148925	NA	0.000111676	18.75	0.0177961	25	0.00175039	NA	0	20.8333	0.0234296	NA
3	0.833333	0.0712468	0.833333	0.0520167	0.833333	0.0106543	0.833333	0.17248	0.833333	0.243624	0.833333	0.0379224	0.655	0.0201953	0.833333	0.384474	0.833333	0.0374886	0.833333	0.0496748	0.833333	0.182268	0.833333	0.384484	0.833333	0.040119	0.833333	0.00259531	NA	4.02827e-05	NA	8.83994e-05	NA	2.31179e-05	NA	0.000444434	37.5	0.0360597	NA	0.000170772	37.5	0.0382955	50	0.00160109	NA	0	41.6667	0.0416097	NA
4	1.66667	0.139966	1.66667	0.0808813	1.66667	0.0217619	1.66667	0.332997	1.66667	0.475184	1.66667	0.0696541	1.31	0.0378289	1.66667	0.833938	1.66667	0.0651982	1.66667	0.0972793	1.66667	0.348898	1.66667	0.778268	1.66667	0.0831371	1.66667	0.00369232	NA	5.04752e-05	NA	9.85387e-05	NA	9.55048e-05	NA	0.000678969	75	0.0655688	NA	7.91921e-05	75	0.0670418	100	0.00228785	NA	0	83.3333	0.071892	NA
5	3.33333	0.263697	3.33333	0.133613	3.33333	0.0418593	3.33333	0.622931	3.33333	0.848031	3.33333	0.124287	2.62	0.0716651	3.33333	1.48351	3.33333	0.127601	3.33333	0.182314	3.33333	0.605948	3.33333	1.30175	3.33333	0.141281	3.33333	0.00435905	NA	0.000129485	NA	4.45229e-05	NA	9.05012e-05	NA	0.000388304	150	0.128326	NA	8.76298e-05	150	0.126284	200	0.00312289	NA	0.000106386	166.667	0.125757	NA
6	6.66667	0.605482	6.66667	0.280578	6.66667	0.0953944	6.66667	1.38895	6.66667	1.77631	6.66667	0.256733	5.24	0.148111	6.66667	3.11521	6.66667	0.251696	6.66667	0.401039	6.66667	1.25102	6.66667	2.82559	6.66667	0.300477	6.66667	0.00531278	NA	0.000311467	NA	6.34833e-05	NA	4.73533e-05	NA	0.000813338	300	0.28758	NA	0.000121691	300	0.286125	400	0.00665286	NA	0.000144564	333.333	0.285332	NA
7	13.3333	1.16612	13.3333	0.518482	13.3333	0.175593	13.3333	2.70792	13.3333	3.90738	13.3333	0.532157	10.48	0.243899	13.3333	5.83474	13.3333	0.420553	13.3333	0.793177	13.3333	2.18289	13.3333	5.48585	13.3333	0.620965	13.3333	0.012149	NA	0.000406031	NA	0.000125927	NA	9.23122e-05	NA	0.0012827	600	0.561793	NA	0.000125856	600	0.558466	800	0.0105159	NA	0.000260525	666.667	0.573943	NA
8	26.6667	2.15185	26.6667	0.9776	26.6667	0.348951	26.6667	5.32993	26.6667	7.55705	26.6667	0.907382	20.96	0.386528	26.6667	9.908	26.6667	0.707076	26.6667	1.61301	26.6667	3.38007	26.6667	9.26309	26.6667	1.21849	26.6667	0.0231668	NA	0.00077509	NA	0.000182739	NA	9.27417e-05	NA	0.0023173	1200	1.04255	NA	0.000173522	1200	1.04104	1600	0.0198214	NA	0.000493051	1333.33	1.10402	NA
9	53.3333	4.39875	53.3333	1.925	53.3333	0.689515	53.3333	12.208	53.3333	18.8214	53.3333	2.16033	41.92	0.60514	53.3333	18.3945	53.3333	1.06416	53.3333	2.94622	53.3333	4.50566	53.3333	13.6802	53.3333	2.3192	53.3333	0.0556134	NA	0.00134651	NA	0.000199125	NA	0.000498532	NA	0.00284615	2400	1.94758	NA	0	2400	1.96558	3200	0.0412121	NA	0.0017851	2666.67	2.2344	NA
[truncated: 11 more columns]
