# Supplementary material for: Metabolic response of blood vessels to TNFα
Source: eLife. 2020 Aug 4;9:e54754. doi: 10.7554/eLife.54754 (PMC7476757; doi:10.7554/eLife.54754)
Supplement: Table 1—source data 1. [file elife-54754-table1-data1.xlsx]

## Sheet: Source data 2
	Peak Area Ratio (a.u.)
	EGM2			EGM2 HUVECs
PGF3a	0.0148614	0.00584784	0.0079554	0.0037564	0.00595599	0.00415178
8-iso-15(R)-PGF2a	0	0.0097394	0	0.0120128	0.0233184	0.0170228
8-iso-PGF1a	0	0	0	0	0	0
8-iso-13_14-dihydro-PGF2a	0.143654	0	0	0	0	0
8-iso-PGF2a	0	0.0097394	0	0.0120128	0.0233184	0.0170228
PGF2a	0.0713179	0.0548089	0.0563452	1.13031	1.13755	0.861801
5-iPF2a_VI	0.0119752	0.00984841	0.00751092	0.023913	0.0189993	0.0256944
8_12-iPF2a VI	0.008422	0.0105167	0.00799335	0.0205671	0.0170376	0.017053
LPA C14_0	0.0680661	0.102104	0.0619533	0.0143265	0.0137445	0.00966769
LPA C20_5	0.0552429	0.0790286	0.052283	0.0241304	0.0150589	0.0154095
LPA C18_3 (w3/w6)	0.0281377	0.0477048	0.0285496	0.00208252	0.00161362	0.00166872
LPA C16_1	0.416485	0.533	0.365904	0.0220751	0.0163507	0.0133157
LPA C22_6	0.793497	1.0416	0.704456	0.0646978	0.0438601	0.0350487
LPA C18_2	0.4998	0.694364	0.475446	0.00963398	0.00435122	0.00765555
LPA C20_4	1.08132	1.46282	1.08567	0.050438	0.034733	0.0319584
LPA C22_5	0.573688	0.800181	0.587784	0.0459427	0.0324383	0.0294239
LPA C16_0	0.963623	1.12475	0.949769	0.054616	0.043727	0.0440063
LPA C18_1	1.46406	1.99797	1.49825	0.0502688	0.0410991	0.0112138
S-1-P C18_1	0.00334447	0.003726	0	0.00311399	0.00259475	0.00184989
LPA C22_4	0.0977999	0.126337	0.0886139	0.0169507	0.0195599	0.0166846
cLPA C20_4	0.0476519	0.0514062	0.0406927	0.00107314	0.000432094	0.000271845
LPA C18_0	0.370879	0.454183	0.323712	0	0	0
cLPA C18_2	0.00587133	0.00760288	0.00693162	0	0	0
LPA C20_1	0.0203593	0.0207621	0.0169143	0	0	0
cLPA C16_0	0.0449347	0.00105545	0.0359359	0.00176476	0.0014854	0.00229061
cLPA C20_3	0.0175826	0.0185544	0.0189307	0.000503692	0.000166104	0.000347937
cLPA C18_1	0.0512818	0.0589856	0.0447288	0.00233356	0.00138392	0.00228855
cLPA C18_0	0.0345716	0.032175	0.0274503	0.00353796	0.00192663	0.00300335
LPA C20_3	0.127483	0.176479	0.131009	0.00591561	0.00375401	0.00566044
