# Supplementary material for: Metabolic response of blood vessels to TNFα
Source: eLife. 2020 Aug 4;9:e54754. doi: 10.7554/eLife.54754 (PMC7476757; doi:10.7554/eLife.54754)
Supplement: Table 3—source data 1. [file elife-54754-table3-data1.xlsx]

## Sheet: Sheet1
Sample	PGF1a	PGF2a	PGF3a	PGE2	PGE1	PGD2	13, 14-dihydro-PGF2a	PGA2	8-iso-13, 14-dihydro-PGF2a	8-iso-PGF2a	8-iso-PGE2	8-iso-PGE1	5-iPF2a	8, 12-iPF2a IV	LPA C14_0	LPA C16_1	LPA C22_6	LPA C18_2	LPA C20_4	LPA C22_5	LPA C16_0	LPA C18_1	cLPA C20_4	LPA C18_0	cLPA C16_0	cLPA C18_0	S-1-P C18_1	Sph C18_1	Spha C18_0	PAF C16_0
3D_EGM2_HUVECs1_1	0.0271234	0.149314	0.000196504	0.0400732	0.00679584		0.00238501	0.00146171	0.0136016	0.00494093	0.00899235		0.0165394	0.00609166	0.00157816	0.00511488	0.00457067	0.00129524	0.00472368	0.003056	0.00586156	0.00979248	0.000390915	0.00829588	0.00105966	0.00223347	0.00232493	15.458	1.84384	0.801738
3D_EGM2_HUVECs1_2	0.0330189	0.183552	0.00021312	0.0432686	0.00720207		0.00262422	0.0020922	0.0174073	0.00651231	0.00942366	0.0166599	0.0157778	0.00565544	0.00125086	0.00449492	0.00411723	0.00125507	0.00396517	0.00282242	0.00507602	0.00861567	0.000238556	0.0069686	0.000969884	0.00181264	0.00267062	27.1574	3.86125	0.627824
3D_EGM2_HUVECs1_3	0.0293688	0.159513	0.000207886	0.036225	0.00643183	0.0102422	0.00281332	0.00222672	0.0164159	0.00671414	0.0107771	0.0174671	0.0143541	0.00693478	0.0013033	0.00519789	0.00433244	0.00125363	0.00419865	0.00330051	0.00418794	0.0093486	0.000237032	0.00636069		0.00219593	0.00224231	15.2083	1.5715	0.679646
3D_EGM2_HUVECs1_4	0.0337902	0.178105	0.000156845	0.043744	0.00566396		0.00282003	0.00169701	0.0156395	0.0064415	0.00905189	0.0168777	0.0155747	0.00797684	0.00128737	0.00492867	0.00364684	0.00136652	0.00388033	0.00316226	0.00479051	0.00952747	0.000268705	0.00810428	0.00108761	0.00236559	0.00249495	18.8504	1.88658	0.658138
3D_EGM2_HUVECs1_5	0.032819	0.18745	0.000203555	0.0457111	0.00825293	0.0106087	0.00321709	0.00239119	0.0187278	0.00761219	0.00849446		0.01382	0.00847566		0.00386216	0.00377047	0.0013628	0.0043272	0.00259185	0.00472725	0.00887167	0.000153782	0.00557311	0.000904917	0.00199062	0.00298635	14.5663	1.6569
3D_EGM2_HUVECs1_6	0.0304373	0.176743	0.000400287	0.0369591	0.00663517	0.0124233	0.00301826	0.00143171	0.0159693	0.00591302	0.0100542	0.0198255	0.0154875	0.00686438		0.00438404	0.00415872	0.00118342	0.00382056	0.00253502			0.000252017	0.00587762	0.00106766	0.00190502	0.00199443	13.4228	1.60624
Average (a.u.)	0.0310929	0.172446	0.000229699	0.0409968	0.0068303	0.0110914	0.00281299	0.00188342	0.0162936	0.00635568	0.00946561	0.0177075	0.0152589	0.00699979	0.00135492	0.00466376	0.0040994	0.00128611	0.0041526	0.00291134	0.00492866	0.00923118	0.000256835	0.00686336	0.00101795	0.00208388	0.00245226	17.4439	2.07105	0.691836
Concentration (nM)	0.377748	4.80538	0.0177218	0.181624	0.0196938	0.279126	0.186082	0.00539525	0.762995	0.113017	0.0981583	0.063632	0.347644	6.95164	NA	NA	NA	NA	5.06534	NA	5.95776	738.014	NA	8.20858	NA	NA	1.64947	37.5322	5.05419	103.436
3D_EGM2_HUVECs2_1	0.0299651	0.153085	0.000183683	0.0443826	0.00448072	0.00841858	0.00222684	0.0014372	0.0158584	0.00700523	0.0106519	0.0140125	0.0123294	0.00728658	0.00127103	0.00474316	0.00338479	0.0013574	0.00371784	0.00220781	0.00529849	0.00926635	0.000242503	0.00644539	0.00102196	0.00203084	0.00336551	17.7564	1.65088	0.890177
3D_EGM2_HUVECs2_2	0.0275943	0.141176	0.000274678	0.0401232	0.00839037	0.00300204	0.00285505	0.00234055	0.0124798	0.00538169	0.00870934	0.0171321	0.0166654	0.00846108	0.00157282	0.00635491	0.0047494	0.00194504	0.00501421	0.00381057	0.00516142	0.0100918	0.000255631	0.00563788	0.00106466	0.00151475	0.00253043	24.9166	2.90359	0.831969
3D_EGM2_HUVECs2_3	0.0209892	0.129654	0.000122935	0.0409848	0.00955114	0.00481698	0.00273445	0.00279961	0.0122086	0.00553943	0.00891818	0.0132516	0.0140856	0.00825504	0.00141865	0.00563199	0.00469013	0.00125517	0.00535741	0.00305835	0.00553407	0.00938328	0.000468703	0.00871005	0.00126074	0.00219455	0.00364716	18.4229	1.89885	1.01442
3D_EGM2_HUVECs2_4	0.0348002	0.17451	0.000174968		0.0076119		0.0029969	0.00234019	0.0152428	0.00621654	0.0104812	0.0166323	0.0158612	0.00805076	0.00153466	0.00490513	0.00345622	0.00140276	0.00387369	0.00239964	0.00568223	0.00994302	0.000236145	0.00615526	0.000974615	0.00166394	0.00382793	24.3948	2.57187
3D_EGM2_HUVECs2_5	0.0194242	0.107436	0.000311814	0.0383632	0.00877296	0.0111855	0.00250318	0.00311089	0.0113834	0.00503837	0.00937386	0.0174993	0.0143828	0.00606729	0.00143749	0.00484437	0.00339577	0.00130896	0.004588	0.00243891	0.00486118	0.00955458	0.000302026	0.00772685	0.00108004	0.00203305	0.00302321	16.8174	1.83946	1.09669
3D_EGM2_HUVECs2_6	0.0207477	0.104631	0.000423023	0.0372191	0.00844419	0.0120103	0.00193824	0.00191117	0.00967747	0.00403737	0.009307	0.0169881	0.0146289	0.00657605	0.00175605	0.00548756	0.00428749	0.00144381	0.00488446	0.00265602	0.00621457	0.00942309	0.00049725	0.00811322	0.00113772	0.00216207	0.00294464	18.9221	1.88756	1.00725
Average	0.0255868	0.135082	0.000248517	0.0402146	0.00787521	0.00788667	0.00254244	0.00232327	0.0128084	0.00553644	0.00957358	0.0159193	0.0146589	0.00744947	0.00149845	0.00532785	0.00399397	0.00145219	0.0045726	0.00276188	0.00545866	0.00961035	0.00033371	0.00713144	0.00108996	0.0019332	0.00322315	20.205	2.12537	0.968101
Concentration (nM)	0.310854	3.76419	0.0191736	0.178159	0.0227066	0.198476	0.168185	0.00665524	0.599792	0.0984489	0.099278	0.057206	0.333974	7.39821	NA	NA	NA	NA	5.57766	NA	6.59843	768.329	NA	8.5292	NA	NA	2.16799	43.4732	5.18675	144.741
3D_EGM2_HUVECs3_1	0.027582	0.111461	0.000152664	0.0380987	0.00888968	0.0135854	0.0023432	0.0028656	0.0124199	0.00558111	0.0101747	0.0167367	0.0153531	0.0060041	0.00163689	0.0052149	0.00329811	0.00153055	0.00412771	0.00204942	0.00637106	0.00907449	0.000312971	0.00643621	0.00113654	0.00206013	0.00380535	22.536	3.17291	1.05289
3D_EGM2_HUVECs3_2	0.0272326	0.109767	0.000362212	0.036557	0.00783341	0.00838376	0.00211381	0.00192599	0.0111572	0.00462428	0.00896	0.0150489	0.0149973	0.0060671	0.00145144	0.00523378	0.00307102	0.00136257	0.00338708	0.00167744	0.0055164	0.00863537	0.000337306	0.00703414	0.0011314	0.00181677	0.00392962	22.4679	3.31792	0.947189
3D_EGM2_HUVECs3_3	0.029826	0.124781	0.00017765	0.0346942	0.00876073	0.00734861	0.00250041	0.00168067	0.0128637	0.00536013	0.00884268	0.015944	0.0139611	0.0067713	0.00156131	0.00635009	0.00446281	0.00177994	0.00478729	0.00235554	0.0073574	0.0106369	0.000348787	0.00766488	0.00117293	0.00250205	0.00473089	32.6517	3.87104	1.02237
3D_EGM2_HUVECs3_4	0.0332441	0.134683	0.000382786	0.0379008	0.00972636	0.0248816	0.00271792	0.00258439	0.0128451	0.00566108	0.0100013	0.0192562	0.0160708	0.00691751	0.00199374	0.00647912	0.00404531	0.00189307	0.00501438	0.00273963	0.00698311	0.0103869	0.000420271	0.00439255	0.00123097		0.00388149	28.9368	3.21936	0.93667
3D_EGM2_HUVECs3_5	0.0311474	0.118083	0.000191562	0.0406581	0.0092243	0.00308471	0.00237158	0.00225366	0.0111492	0.00597054	0.00848026	0.0186666	0.0139471	0.00629104	0.00183821	0.00734907	0.00369044	0.0016915	0.00460588	0.00236997	0.00588623	0.00946143	0.00025315	0.00515684	0.00102578	0.00240008	0.0029169	17.5615	3.12605	1.00131
3D_EGM2_HUVECs3_6	0.0288038	0.111141	0.00027782	0.0369716	0.00785006	0.0106758	0.00234148	0.00145516	0.0104127	0.00608458	0.00809451	0.0223421	0.0157963	0.00668743	0.0016797	0.00541636	0.00332339	0.00115937	0.00400123	0.00238361	0.00537468	0.0103314	0.000342244	0.00456397	0.00110545	0.00164055	0.0033964	19.9984	2.54027	1.00599
Average	0.0296393	0.118319	0.000257449	0.0374801	0.00871409	0.0113266	0.00239807	0.00212758	0.011808	0.00554695	0.00909225	0.0179991	0.0150209	0.00645641	0.00169355	0.00600722	0.00364851	0.0015695	0.00432059	0.0022626	0.00624815	0.00975441	0.000335788	0.00587476	0.00113385	0.00208392	0.00377678	24.0254	3.20792	0.994403
Concentration (nM)	0.360088	3.29709	0.0198627	0.166044	0.0251253	0.285046	0.158635	0.00609466	0.552944	0.0986359	0.0942866	0.0646797	0.342222	6.41199	NA	NA	NA	NA	5.27026	NA	7.55276	779.846	NA	7.02622	NA	NA	2.54037	51.693	7.82862	148.673
3D_0.4 ng/ml TNF_HUVECs1_1	0.0418994	0.211589	0.000215958	0.0377909	0.00575273	0.0098575	0.00269081	0.00192564	0.0218439	0.00710657	0.00810958	0.0219026	0.0136452	0.00589552	0.00108469	0.0039995	0.00438242	0.000941405	0.00437133	0.00382304		0.00868581	0.000166948	0.00633991	0.000984406	0.0018465	0.00272383	18.3784	2.06416	0.637124
3D_0.4 ng/ml TNF_HUVECs1_2	0.0406661	0.220753	0.00036132	0.0439427	0.00814608		0.00298417	0.0016294	0.0228837	0.00827573	0.0109063	0.0185666	0.0132711	0.00550206	0.00138309	0.00392965	0.0041872	0.0012553	0.00478814	0.00312611	0.00541709	0.00841887	0.000323401	0.00857056	0.00109164	0.00233896	0.00348577	17.9409	1.92401	0.635774
3D_0.4 ng/ml TNF_HUVECs1_3	0.0416963	0.234732	0.000299689	0.0433502	0.00710192	0.00688229	0.00335787	0.00312375	0.0215939	0.00808823	0.00744499	0.0139604	0.0153957	0.00622762	0.00121116	0.00465636	0.00397143	0.00133876	0.00418787	0.00371663	0.00447016	0.00960318	0.00026088	0.00685349	0.000936668	0.00209274	0.00288254	15.0882	1.90286	0.616327
3D_0.4 ng/ml TNF_HUVECs1_4	0.0377881	0.193624	0.000281633	0.0374786	0.00667161	0.00947585	0.00287658	0.00200562	0.0190032	0.00678273	0.0090932	0.0167807	0.012123	0.00678465	0.00150385	0.00492308	0.00419377	0.00142642	0.00428013	0.00344279	0.00491001	0.0103661	0.000385335	0.00714313	0.000917077	0.00197379	0.0027535	18.4337	2.33558	0.693621
3D_0.4 ng/ml TNF_HUVECs1_5	0.0425606	0.21995		0.0427478	0.00896664	0.00953767	0.00316091	0.00179391	0.0206252	0.00763496	0.00970562	0.0157506	0.0125294	0.00794048	0.00136657	0.00455911	0.00385449	0.00154032	0.00480012	0.00366473	0.00569864	0.0083609	0.000239012	0.00788055	0.000974449	0.00227064	0.00258115	16.1975	1.88839	0.680604
3D_0.4 ng/ml TNF_HUVECs1_6	0.044708	0.240279	0.000397921	0.0433751	0.00581323		0.00383371	0.00202627	0.0226345	0.00808891	0.00803273	0.0134325	0.0156265	0.00706967	0.00120101	0.00474246	0.00431819	0.00132384	0.00460497	0.00317975	0.00505253	0.00959355	0.000382028	0.00907608	0.000864226	0.00219022	0.0034174	17.0624	1.69283	0.657136
Average	0.0415531	0.220155	0.000311305	0.0414476	0.00707537	0.00893833	0.00315067	0.0020841	0.0214308	0.00766285	0.00888207	0.0167322	0.0137652	0.00657	0.00129173	0.00446836	0.00415125	0.00130434	0.00450543	0.00349217	0.00510969	0.0091714	0.000292934	0.00764395	0.000961411	0.00211881	0.00297403	17.1835	1.96797	0.653431
Concentration (nM)	0.504828	6.13483	0.0240178	0.183621	0.0204004	0.224942	0.20842	0.00597011	1.00356	0.136261	0.0921071	0.0601273	0.313612	6.5248	NA	NA	NA	NA	5.49572	NA	6.17659	733.235	NA	9.14217	NA	NA	2.00042	36.9721	4.80263	97.6945
3D_0.4 ng/ml TNF_HUVECs2_1	0.0318569	0.157038	0.00049655	0.0358024	0.00427311	0.00990258	0.00252142	0.00141272	0.0147684	0.00615636	0.00762242	0.0130953	0.0150839	0.00624171	0.00146296	0.00429302	0.00367526	0.00174425	0.0048201	0.0032604	0.00558382	0.00956045	0.000207101	0.0084005	0.0011415	0.00202131	0.00315098	18.6408	2.61506	1.05375
3D_0.4 ng/ml TNF_HUVECs2_2	0.0387035	0.165255		0.0470621	0.0120374	0.0116715	0.0028461	0.00224234	0.0155498	0.0063222	0.0100624	0.0138773	0.0145492	0.00744844		0.00720429	0.00542569	0.00176455		0.00266483				0.00799397	0.00137754	0.00245543	0.00391074	26.9952	3.81765	1.10979
3D_0.4 ng/ml TNF_HUVECs2_3	0.0319047	0.158328	0.000375809	0.03711	0.0111077		0.00274529		0.0161368	0.00574992	0.00974801	0.0170905	0.0125149	0.00730887	0.00147995	0.00512957	0.00488493	0.00132808	0.00404063	0.00296672	0.00518614	0.0098445	0.000280231	0.00784927	0.00107046	0.00151588	0.00274014	18.1541	1.94357	1.09455
3D_0.4 ng/ml TNF_HUVECs2_4	0.0370781	0.163085	0.000535301	0.0394724	0.00758521	0.00893502	0.00266409	0.0011497	0.0160555	0.00560119	0.00888145	0.0182396	0.0134629	0.00634034	0.00165745	0.00506919	0.00430693	0.00115268	0.00512142	0.00366657	0.00532613	0.0100849	0.000303987	0.00774758	0.00104559	0.00189566	0.00285239	18.8772	2.25684	1.03439
3D_0.4 ng/ml TNF_HUVECs2_5	0.0363177	0.153396	0.000204356	0.0371052	0.00698373	0.0126124	0.0025674	0.00259632	0.0144282	0.00533654	0.00771932	0.015065	0.013584	0.0061983													0.0023431	20.3737	2.22795	1.62114
3D_0.4 ng/ml TNF_HUVECs2_6	0.0397738	0.185827	0.000300722	0.0522495	0.0101084		0.00266238	0.00134591	0.0160044	0.00678638	0.00839665	0.0169541	0.0163478	0.00741557	0.00153575	0.00476675	0.00396899	0.00155752	0.00522449	0.00329254	0.00501859	0.00975095	0.000250583	0.00593615	0.00114525	0.00217064	0.00317242	23.8026	2.38191	0.780976
Average	0.0359391	0.163822	0.000382548	0.0414669	0.00868259	0.0107804	0.00266778	0.0017494	0.0154905	0.0059921	0.00873838	0.0157203	0.0142571	0.00682554	0.00153403	0.00529256	0.00445236	0.00150942	0.00480166	0.00317021	0.00527867	0.0098102	0.000260475	0.00758549	0.00115607	0.00201178	0.00302829	21.1406	2.5405	1.11577
Concentration (nM)	0.436624	4.56505	0.0295143	0.183707	0.0250345	0.271299	0.176476	0.00501133	0.72539	0.106552	0.090617	0.0564909	0.32482	6.77858	NA	NA	NA	NA	5.85706	NA	6.38086	784.306	NA	9.07225	NA	NA	2.03692	45.4861	6.19983	166.818
3D_0.4 ng/ml TNF_HUVECs3_1	0.0567137	0.193579	0.000150512	0.0475637	0.0100961		0.00292941	0.00205266	0.0189616	0.00667412	0.00857004		0.0157641	0.00510516	0.00115381	0.00468438	0.00434956	0.00107739	0.00417785	0.00223045	0.00494101	0.0093586	0.000165378	0.00520746	0.00107045	0.00158263	0.00311553	26.092	2.98417	0.852086
3D_0.4 ng/ml TNF_HUVECs3_2	0.063293	0.225731	0.000322456	0.058386	0.0125851		0.00316727	0.00327375	0.0189406	0.008161	0.0110202		0.0162408	0.00615047	0.00134845	0.00599942	0.00434399	0.00143048	0.00486599	0.00257276	0.00535925	0.00959716	0.000260341	0.00689349	0.00120338	0.0019191	0.00307602		4.13795	0.721913
3D_0.4 ng/ml TNF_HUVECs3_3	0.0455087	0.182113	0.000310432	0.0483002	0.00984962	0.0124431	0.00269757	0.00155304	0.0166299	0.00625793	0.0104739	0.0162186	0.0159222	0.00699057	0.00166069	0.00626038	0.00473998	0.00160968	0.00475924	0.00333107	0.00652539	0.0105624	0.000245651	0.00482009	0.00107711	0.00172981	0.00271799	22.2457	2.71002	0.800006
3D_0.4 ng/ml TNF_HUVECs3_4	0.0377618	0.145888	0.000365275	0.0396195	0.0112477	0.0108703	0.00285039	0.00107233	0.014447	0.00570022	0.0107777	0.0166589	0.0163154	0.00675084	0.00133224	0.00507646	0.00386431	0.00160936	0.00483603	0.00278371	0.00527925	0.0102222	0.000210201	0.00629692	0.000919035	0.0020672	0.00306763	28.7134	3.24941	0.96324
3D_0.4 ng/ml TNF_HUVECs3_5	0.0591382	0.225299	0.000293949	0.0540874	0.00699751	0.00937503	0.00351027	0.00334243	0.018998	0.00734369	0.00878682	0.0168442	0.0167887	0.00667789	0.00158113	0.00581733	0.00467481	0.00123676	0.00434671	0.00230622	0.00498482	0.0101033	0.000224119	0.00737935	0.0009052	0.00216169	0.00408263	24.296	3.31685	0.762949
3D_0.4 ng/ml TNF_HUVECs3_6	0.0535476	0.18529	0.00026709	0.0413369	0.00822374		0.00297435	0.00204952	0.0157341	0.00704998	0.00797875	0.017502	0.0147545	0.00694844	0.00140814	0.00455036	0.00327782	0.0014388	0.00366131	0.00214825	0.00473153	0.00929575	0.000289105	0.0055718	0.00103411	0.00186679	0.00440702	22.1964	2.3827	0.9482
Average	0.0526605	0.192983	0.000284952	0.0482156	0.00983329	0.0108962	0.00302155	0.00222396	0.0172852	0.00686449	0.00960124	0.0168059	0.0159643	0.00643723	0.00141408	0.00539805	0.00420841	0.00140041	0.00444119	0.00256208	0.00530354	0.00985657	0.000232466	0.00602818	0.00103488	0.00188787	0.00341114	24.7087	3.13018	0.841399
Concentration (nM)	0.639772	5.37767	0.0219846	0.213605	0.0283523	0.274213	0.199878	0.00637074	0.809431	0.122064	0.0995649	0.060392	0.363714	6.39294	NA	NA	NA	NA	5.41736	NA	6.41092	788.013	NA	7.20971	NA	NA	2.29443	53.1632	7.6389	125.798
3D_15 ng/ml TNF_HUVECs1_1	0.0948862	0.462289	0.000536741	0.0658429	0.00922645	0.0106185	0.00423955	0.00108661	0.0393405	0.0124563	0.00866152	0.0148881	0.0163221	0.00693166	0.00110637	0.00389246	0.00484878	0.00128279	0.00520888	0.00406503	0.00429013	0.00929063	0.000258323	0.00696384	0.00107602	0.00188686	0.00193393	13.3836	1.74218	0.709251
3D_15 ng/ml TNF_HUVECs1_2	0.0937608	0.44442	0.000356843	0.0685758	0.00797377	0.0124101	0.0035788	0.00219839	0.0383147	0.0131146	0.0115206	0.0149382	0.0157792	0.00722683	0.0011146	0.00302573		0.00129333	0.00504576	0.00379417	0.00410852	0.00914561	0.000236112	0.0063089	0.000856818	0.0015772	0.00150388	20.3163	2.24877	0.629685
3D_15 ng/ml TNF_HUVECs1_3	0.087721	0.411536	0.000252506	0.0587657	0.00760854	0.0384012	0.00334206	0.00224514	0.0337513	0.0112454	0.00847509	0.0150634	0.0131257	0.00692189	0.00126167	0.00371946		0.0013545	0.00466143	0.00311671	0.0036314	0.0092949	0.0001205	0.00764022	0.00104699	0.00186517	0.00211631	18.9921	2.06762	0.556223
3D_15 ng/ml TNF_HUVECs1_4	0.0817527	0.403878	0.000653101	0.0581316	0.00755742	0.0046056	0.00354916	0.00150445	0.0344387	0.0124644	0.0101379	0.0139023	0.0136269	0.00602356	0.00083439	0.00271211	0.00321318	0.00118747	0.00402374	0.00299378	0.00374536	0.00809646	0.000241107	0.00574324	0.000824203	0.00130771	0.00151989	18.3195	2.13248	0.630838
3D_15 ng/ml TNF_HUVECs1_5	0.105871	0.507007	0.000824334	0.0703893	0.0100952	0.00477776	0.00424437	0.0014478	0.0415862	0.0129739	0.0088954	0.0154483	0.0143441	0.006945	0.00116856	0.00336621	0.00486853	0.00140416	0.00484089	0.00202941	0.00450519	0.0100094	0.000324477	0.00764338	0.000870938	0.00169725	0.00283351	16.2222	1.80443	0.705742
3D_15 ng/ml TNF_HUVECs1_6	0.100012	0.499775	0.000393105	0.0827816	0.0111318	0.0152148	0.0042669	0.00157635	0.0441328	0.0138546	0.0105721	0.0178712	0.0137172	0.00772465	0.000915751	0.00263737	0.00343607	0.00105032	0.00367352	0.00240708	0.00306622	0.00796745	0.000222601	0.00697765	0.000786386	0.00136514	0.00215213	18.3996	1.8148	0.488378
Average	0.0940005	0.454817	0.000502772	0.0674145	0.00893221	0.014338	0.00387014	0.00167646	0.038594	0.0126849	0.00971043	0.0153519	0.0144859	0.00696226	0.00106689	0.00322556	0.00409164	0.0012621	0.0045757	0.0030677	0.00389114	0.00896741	0.000233853	0.00687954	0.000910226	0.00161655	0.00200994	17.6056	1.96838	0.62002
Concentration (nM)	1.14201	12.6739	0.0387899	0.29866	0.0257542	0.36083	0.256014	0.00480238	1.80728	0.225562	0.100697	0.0551671	0.330032	6.91436	NA	NA	NA	NA	5.58144	NA	4.70361	716.926	NA	8.22793	NA	NA	1.35195	37.8801	4.80363	92.6991
3D_15 ng/ml TNF_HUVECs2_1	0.105431	0.391756	0.000532347	0.0525215	0.00932849	0.0115323	0.00393719	0.00184781	0.0306661	0.0100336	0.00895985	0.0147625	0.0145964	0.00497935	0.00138391	0.00409026	0.0050608	0.00164738	0.00536786	0.00275928	0.00624031	0.0114544	0.000417224	0.0103857	0.0010505	0.00225804		22.7033	2.73081
3D_15 ng/ml TNF_HUVECs2_2	0.111568	0.39473	0.000850295	0.0524785	0.0116974	0.0117912	0.00381888	0.000906321	0.0321771	0.0104658	0.00979373	0.0127338	0.0130307	0.00667364	0.00144428	0.00479448	0.00589212	0.00126752	0.00613343	0.00332008	0.00532471	0.011406	0.000300409	0.00707136	0.000979113	0.00164174	0.00169397	18.0881	2.16183
3D_15 ng/ml TNF_HUVECs2_3	0.113125	0.455569	0.000954769	0.0782823	0.0120959	0.0683003	0.00441409	0.0020519	0.0346374	0.0123913	0.00978448	0.0165131	0.0154919	0.00697966	0.00141621	0.00508655	0.00693447	0.00190808	0.00786053	0.00450766	0.00569455	0.0130866	0.00023248	0.010204	0.000960712	0.00283293		22.1899	2.83414	0.844124
3D_15 ng/ml TNF_HUVECs2_4	0.0961619	0.350072	0.000618126	0.0491302	0.00999518	0.00397557	0.00382511	0.00134302	0.0316579	0.00935737	0.00975607	0.0126602	0.0148298	0.00764377	0.00151679	0.00463217	0.0061173	0.00160905	0.00628915	0.00455376	0.00521106	0.0117538	0.000400385	0.00625256	0.000893477	0.00220248	0.00230474	18.7849	2.15626	0.933353
3D_15 ng/ml TNF_HUVECs2_5	0.095793	0.37224	0.000782883	0.0587055	0.00983547	0.00718919	0.00432619	0.00155481	0.0312946	0.00979923	0.00983473	0.0513552	0.0131082	0.00643545	0.00146253	0.00468988	0.007107	0.00180529	0.00720957	0.00542409	0.00587753	0.011487	0.000314651	0.00921488	0.00100495	0.00186942		39.6586	4.35669	0.961397
3D_15 ng/ml TNF_HUVECs2_6	0.0968041	0.361227	0.000252779	0.0576926	0.0103328	0.0127678	0.00375699	0.00219164	0.0294572	0.00946183	0.00884235	0.0358938	0.0171425	0.00697531	0.00159542	0.0058142	0.00683938	0.00186138	0.00730911	0.00484955	0.00653408	0.0117783	0.000438515	0.00977039		0.00214668	0.00207343	28.2881	3.0311
Average	0.103147	0.387599	0.0006652	0.0581351	0.0105475	0.0192594	0.00401307	0.00164925	0.0316484	0.0102515	0.0094952	0.0239864	0.0146999	0.00661453	0.00146986	0.00485126	0.00632518	0.00168312	0.00669494	0.00423574	0.00581371	0.0118277	0.000350611	0.00881648	0.00097775	0.00215855	0.00202405	24.9522	2.87847	0.912958
Concentration (nM)	1.25314	10.8008	0.0513215	0.25755	0.0304117	0.484682	0.265469	0.00472444	1.48203	0.182293	0.0984652	0.0861953	0.334908	6.56902	NA	NA	NA	NA	8.16649	NA	7.02761	945.6	NA	10.5445	NA	NA	1.36143	53.6871	7.02462	136.496
3D_15 ng/ml TNF_HUVECs3_1	0.153005	0.528158	0.000839435	0.0629374	0.0120611	0.00731408	0.00445491	0.0013832	0.0410055	0.0131781	0.0106219	0.0147062	0.0138368	0.00564895	0.00105859	0.00364423	0.00434822	0.00136767	0.0044093	0.00272416	0.00445279	0.00950259	0.000345825	0.00684539	0.00114472	0.00214746		24.5734	3.50528	0.870939
3D_15 ng/ml TNF_HUVECs3_2	0.182571	0.592734	0.0010812	0.078731	0.0126792	0.00483723	0.00522776	0.00107771	0.0452516	0.0146764	0.0103189	0.0146587	0.0142489	0.00699377	0.0013664	0.00401759	0.00472999	0.00164176	0.00566385	0.00388119	0.00532342	0.0114907	0.000185004	0.00632406	0.000925089	0.00179373	0.0029043	32.307	3.74839	0.857888
3D_15 ng/ml TNF_HUVECs3_3	0.146301	0.497985	0.00100131	0.0710505	0.0137399	0.00747419	0.00512794	0.00243404	0.0408591	0.0142887	0.0114912	0.0176202	0.0153077	0.00718348	0.00141613	0.00426118	0.00605258	0.00160237	0.00626392	0.00451677	0.00506295	0.0110132	0.000381684	0.00389915	0.00101337	0.00164363	0.00246382	28.4136	3.3353	0.811426
3D_15 ng/ml TNF_HUVECs3_4	0.128331	0.424416	0.00111207	0.0542826	0.0102711	0.00334563	0.00356346	0.00121999	0.0339661	0.01075	0.0098344	0.0157466	0.0154039	0.00517328	0.00148856	0.00464431	0.00614045	0.00155238	0.005799	0.00299124	0.00521872	0.0107145	0.000178123	0.00473613	0.000969154	0.00146294	0.00234021	25.3902	3.27982	0.85758
3D_15 ng/ml TNF_HUVECs3_5	0.148457	0.483563	0.00112538	0.0659171	0.0136458	0.00914779	0.00382416	0.00180183	0.0354434	0.0141717	0.01092	0.0226683	0.0151228	0.00638795	0.00151884	0.00482605	0.00633882	0.00163438	0.00527091	0.00464931	0.00419154	0.0115576	0.000357533	0.00436131		0.00153961		22.8907	2.85928	0.798528
3D_15 ng/ml TNF_HUVECs3_6	0.156463	0.500089	0.000487124	0.0574563	0.0129295	0.00695134	0.00461608	0.00207823	0.0404402	0.0135117	0.0107403	0.0173968	0.0133085	0.00768841	0.00120676	0.00402406	0.0043487	0.00156088	0.00405907	0.00354014	0.00402238	0.0102251	0.00031308	0.00484765	0.00104259	0.00156303	0.00242308	27.8542	3.60731	0.822576
Average	0.152521	0.504491	0.000941085	0.0650625	0.0125545	0.00651171	0.00446905	0.00166583	0.0394943	0.0134294	0.0106545	0.0171328	0.0145381	0.00651264	0.00134255	0.00423624	0.00532646	0.00155991	0.00524434	0.00371713	0.00471197	0.0107506	0.000293541	0.00516895	0.00101898	0.00169173	0.00253285	26.9049	3.38923	0.836489
Concentration (nM)	1.85298	14.0581	0.0726066	0.28824	0.0361982	0.163874	0.295632	0.00477194	1.84944	0.238802	0.110487	0.0615667	0.331221	6.46783	NA	NA	NA	NA	6.39705	NA	5.69583	859.49	NA	6.18206	NA	NA	1.70367	57.8885	8.27107	125.064
3D_50 ng/ml TNF_HUVECs1_1	0.0873318	0.404437	0.000394164	0.0672112	0.0107379	0.158165	0.00350172	0.00179272	0.034244	0.0115307	0.00985624	0.0180396	0.0140036	0.00787094	0.00140743	0.00480104	0.00568407	0.00150756	0.00650543	0.00525327	0.00414146	0.0111231	0.000229776	0.00644112	0.0010226	0.00184321	0.001679	18.4722	1.73164	0.702457
3D_50 ng/ml TNF_HUVECs1_2	0.0807315	0.386862	0.000396925	0.0624053	0.00517915	0.0124708	0.00373397	0.00199804	0.0367864	0.0114158	0.0088764	0.0137753	0.0149624	0.00762724	0.00135446	0.00360665	0.00545519	0.00144353	0.00580249	0.00402561	0.00514316	0.00919247	0.000385415	0.0100391	0.00111062	0.00218342	0.00291028	23.4119	2.29832	0.801161
3D_50 ng/ml TNF_HUVECs1_3	0.0812094	0.390239	0.000571851	0.0679574	0.00853778	0.192063	0.00407746	0.00273562	0.0325552	0.0108859	0.00957966	0.0198663	0.0132181	0.00675273	0.00127777	0.00472041	0.00755038	0.00154715	0.0057073	0.00395569	0.00606795	0.0125873	0.000311198	0.00987087	0.00115533	0.00285265		23.3451	3.25603	0.696878
3D_50 ng/ml TNF_HUVECs1_4	0.0676094	0.315058	0.000364194	0.0600408	0.00892634	0.172229	0.00353421	0.00170205	0.0313015	0.00923537	0.00872332	0.014476	0.0152632	0.00613112	0.00113419	0.00379195	0.00586526	0.00143106	0.00538458	0.00292066	0.00439944	0.00982017	0.000291683	0.00750747	0.000841987	0.00168794	0.0019075	16.6785	1.92159	0.631624
3D_50 ng/ml TNF_HUVECs1_5	0.0642152	0.317756		0.0607989	0.00798701	0.0145917	0.00335763	0.00168576	0.0307959	0.0103718	0.00958407	0.0146789	0.0156149	0.00664916	0.00116854	0.00308825	0.00519769	0.00106392	0.00522581	0.00316158	0.00480882	0.00935319	0.000213129	0.0101177	0.000858291	0.00214518	0.00183169	27.8266	3.13895	0.680812
3D_50 ng/ml TNF_HUVECs1_6	0.0774023	0.363727		0.0662354	0.00870094	0.14506	0.00419391	0.00263683	0.0325599	0.0104101	0.00895614	0.0177011	0.016504	0.00869107	0.00104687	0.00311318	0.00366329	0.00124248	0.00533806	0.00405438	0.0035266	0.0096996	0.000239333	0.00538883	0.000906275	0.00111633	0.00143964	20.2695	2.11881	0.501316
Average	0.0764166	0.363013	0.000431783	0.0641081	0.00834485	0.115763	0.00373315	0.00209184	0.0330405	0.0106416	0.00926264	0.0164229	0.0149277	0.00728705	0.00123154	0.00385358	0.00556931	0.00137262	0.00566061	0.0038952	0.00468124	0.010296	0.000278422	0.00822751	0.000982517	0.00197145	0.00195362	21.6673	2.41089	0.669041
Concentration (nM)	0.928385	10.1157	0.0333129	0.284012	0.0240607	2.9133	0.246952	0.00599228	1.54722	0.189229	0.0960536	0.0590155	0.340098	7.23691	NA	NA	NA	NA	6.90481	NA	5.65868	823.142	NA	9.84011	NA	NA	1.31406	46.6193	5.88353	100.028
3D_50 ng/ml TNF_HUVECs2_1	0.10878	0.41119	0.000556505	0.0707578	0.014587	0.155628	0.00402713	0.00292966	0.0354902	0.0115653	0.0106852	0.0164931	0.0147695	0.00661778	0.00155882	0.00481404	0.0062183	0.00108564	0.00619855	0.00530577	0.00461739	0.0113914	0.000321612	0.00922245	0.00116689	0.00165471	0.00183461	29.0781	2.8605	0.864096
3D_50 ng/ml TNF_HUVECs2_2	0.106705	0.380987	0.000472353	0.0662618	0.0085937	0.0924373	0.00382551	0.00172667	0.0306613	0.0110473	0.00960133	0.0162396	0.0148509	0.00824036	0.00121814	0.00482374	0.00706503	0.00089926	0.00666747	0.00368936	0.00526985	0.0123218	0.000168281	0.00685134	0.00120512	0.00183521	0.00203966	21.3354	2.14862	0.850732
3D_50 ng/ml TNF_HUVECs2_3	0.115475	0.404409	0.000988493	0.0700305	0.0105158	0.0182534	0.004251	0.00310259	0.0320367	0.0106767	0.0087059	0.0183197	0.0126101	0.00862794	0.00171293	0.0062772		0.0016098	0.00766729	0.00572373	0.00532142	0.0124121		0.00500988	0.00102506	0.00222356	0.0023045	20.4504	2.36604	0.859268
3D_50 ng/ml TNF_HUVECs2_4	0.0773355	0.32249	0.000443512	0.0514319	0.0100597	0.00266575	0.00318435	0.00151486	0.0284714		0.00991269	0.0184302	0.0132889	0.00770568	0.00155254	0.0057313	0.00648808	0.00188149	0.00717061	0.00500056	0.00593277	0.0121328	0.000313791	0.00405708	0.00113752	0.002232	0.00153325	18.457	2.20092
3D_50 ng/ml TNF_HUVECs2_5	0.0759076	0.290137	0.000243235		0.00569352	0.0102044	0.00322283	0.00119136	0.0265808		0.0078211	0.0439569	0.0154335	0.00757554	0.00172093	0.00563688	0.00634533	0.00200304	0.00700293	0.00464737	0.00581936	0.0128334	0.000304135	0.00437912	0.0014729	0.00193567	0.00156264	20.4817	2.39828
3D_50 ng/ml TNF_HUVECs2_6	0.0768942	0.297532	0.000225452		0.00991003	0.012345	0.00344109	0.000914049	0.0233788	0.00863705	0.00874438	0.0141665	0.0143898	0.00735542	0.00153883	0.00521337	0.00572821	0.00175141	0.00620667	0.00454785	0.00456249	0.0116143	0.000339982	0.00464318	0.000912692	0.00171213	0.00177914	22.1071	2.1815
Average	0.0935163	0.351124	0.000488258	0.0646205	0.0098933	0.0485889	0.00365865	0.00189653	0.0294365	0.0104816	0.0092451	0.0212677	0.0142238	0.00768712	0.00155036	0.00541609	0.00636899	0.00153844	0.00681892	0.00481911	0.00525388	0.0121176	0.00028956	0.00569384	0.00115336	0.00193221	0.0018423	21.9849	2.35931	0.858032
Concentration (nM)	1.13613	9.78443	0.0376701	0.286282	0.0285254	1.22279	0.242023	0.00543281	1.37845	0.186384	0.0958717	0.0764253	0.32406	7.63423	NA	NA	NA	NA	8.31772	NA	6.35089	968.781	NA	6.80983	NA	NA	1.23919	47.3028	5.75766	128.284
3D_50 ng/ml TNF_HUVECs3_1	0.156351	0.528589	0.000788966	0.072906	0.0163026	0.0180444	0.00404869	0.00198651	0.0422198		0.0113091	0.0153614	0.0140381	0.0057627	0.00111597	0.00357036	0.00442076	0.00150236	0.00489647	0.00383858	0.00438672	0.0104967	0.000168342	0.00546038	0.000916226	0.00207167	0.00321566	24.5293	3.07229	0.812078
3D_50 ng/ml TNF_HUVECs3_2	0.141792	0.50204	0.000740878		0.0162996	0.703741	0.00411725	0.00369797	0.0419819		0.00911841	0.0183918	0.0157998	0.00682271	0.00115808	0.00503829	0.00529595	0.00169679	0.00570096	0.00467548	0.00442847	0.0113122	0.000384407	0.00624384	0.00118832	0.00225255	0.00288698	22.2182	2.83146	0.829972
3D_50 ng/ml TNF_HUVECs3_3	0.108833	0.387585	0.00046223	0.0629489	0.0107374	0.00473513	0.00355417	0.00268413	0.0317282	0.0107369	0.0100946	0.0161235	0.0181796	0.00672355	0.00115919	0.00369173	0.00392659	0.00122953	0.00412341	0.00340417	0.0032778	0.00818611	0.000188467	0.0046451	0.00103444	0.0016087	0.00138986	20.1352	1.84064	0.814457
3D_50 ng/ml TNF_HUVECs3_4	0.136422	0.451928	0.000591082	0.0702187	0.00946967	0.00657503	0.0038694	0.00227769	0.0365536	0.0131782	0.00919714	0.0121122	0.0155906	0.00732342	0.00107851	0.0039398	0.0047161	0.00114966	0.00472241	0.00296661	0.00363293	0.00913956	0.00025952	0.00528629	0.000870836	0.00187813	0.0018366	22.5406	2.37134
3D_50 ng/ml TNF_HUVECs3_5	0.128687	0.450559	0.000778633	0.0637278	0.0132353	0.00783567	0.00392756	0.00230906	0.0358324	0.0117271	0.00881753	0.0158921	0.0129459	0.00631744	0.00110701	0.00437134	0.00573583	0.0016801	0.00492304	0.00327518	0.00426434	0.0104792	0.000266732	0.00534093	0.0010113	0.00178999	0.00238649	25.4914	2.44942
3D_50 ng/ml TNF_HUVECs3_6	0.107665	0.376338	0.000489264	0.0623841	0.0123264	0.132168	0.00313834	0.00202759	0.0322303	0.0109703	0.0087372	0.0130155	0.0175107	0.00667414	0.00126261	0.00412787	0.00501455	0.00142081	0.00506835	0.00279354	0.00381086	0.00997254	0.00024261	0.0051972	0.00108411	0.00211136	0.00182572	27.3997	2.42585	0.868955
Average	0.129958	0.449506	0.000641842	0.0664371	0.0130618	0.145517	0.0037759	0.00249716	0.0367577	0.0116531	0.00954567	0.0151494	0.0156775	0.00660399	0.00114689	0.00412323	0.00485163	0.00144654	0.00490577	0.00349226	0.00396685	0.00993105	0.00025168	0.00536229	0.00101754	0.00195207	0.00225688	23.7191	2.4985	0.831366
Concentration (nM)	1.57886	12.5259	0.0495194	0.29433	0.0376612	3.66207	0.24978	0.00715336	1.72129	0.207216	0.0989886	0.0544394	0.35718	6.55856	NA	NA	NA	NA	5.98406	NA	4.79513	793.968	NA	6.4133	NA	NA	1.51805	51.0339	6.09734	124.297
3D_20 ng/ml PMA_HUVECs1_1	1.2123	6.4882	0.00769057	0.785984	0.0612907	0.04141	0.0167569	0.0130978	0.470061	0.157313	0.0631988	0.0361866	0.0137577	0.0100993	0.000986907	0.00284401	0.0036367	0.0010005	0.00388345	0.00209238	0.00393632	0.00705477	0.000259337	0.00588899	0.00119431	0.00139075	0.0015816	18.2873	1.8717	0.574291
3D_20 ng/ml PMA_HUVECs1_2	1.28046	6.83398	0.00814282	0.826021	0.0700797	0.0450523	0.0184767	0.0157404	0.508062	0.172913	0.057637	0.028471	0.0130543	0.0105165	0.000963908	0.00285846	0.00338678	0.001057	0.00422909	0.00246707	0.00376067	0.00690965	0.000244924	0.00698346	0.000943502	0.00170546	0.00207408	22.3951	2.64322	0.611535
3D_20 ng/ml PMA_HUVECs1_3	1.38111	7.18424	0.00782913	0.889425	0.0714771	0.0891843	0.0201737	0.0200518	0.512179	0.174332	0.0644462	0.033179	0.0142404	0.0082052	0.000928153	0.00252423	0.00360214	0.00112043	0.00418635	0.00245816	0.00366815	0.00713083	0.000132003	0.00552175	0.000987211	0.00100562	0.00129828	21.5729	2.01195	0.536306
3D_20 ng/ml PMA_HUVECs1_4	1.37728	6.9455	0.00680297	0.849866	0.0736163	0.278901	0.0168584	0.0201354	0.514921	0.166258	0.0553887	0.0331619	0.0160325	0.00780471	0.000985139	0.00294095	0.00459526	0.00124023	0.00574809	0.00285675	0.00436978	0.00903453	0.000310311	0.00722855	0.000851299	0.00190541	0.00162708	18.1435	1.874	0.624416
3D_20 ng/ml PMA_HUVECs1_5	1.21639	6.30141	0.00780339	0.730014	0.0577258	0.0434128	0.0158212	0.0193521	0.447028	0.147082	0.0535992	0.03032	0.0160069	0.00555789	0.00097335	0.00387905	0.0048688	0.00111744	0.00495847	0.00338112	0.0044834	0.00939534	0.000343805	0.00677375	0.00109205	0.00235661	0.00111021	15.9774	1.7983	0.710772
3D_20 ng/ml PMA_HUVECs1_6	1.22152	6.28126	0.00742092	0.767101	0.061229	0.233728	0.0155706	0.0180795	0.484416	0.159484	0.0575308	0.0335177	0.017699	0.00770457	0.00121184	0.00361137	0.00511533	0.00127824	0.00501906	0.00391626	0.00474722	0.00874274	0.000409641	0.00747626	0.00120115	0.00140464	0.00168903	18.0011	2.027	0.637239
Average	1.28151	6.67243	0.00761497	0.808068	0.0659031	0.121948	0.0172763	0.0177428	0.489445	0.162897	0.0586335	0.0324727	0.0151318	0.00831469	0.00100822	0.00310968	0.00420084	0.00113564	0.00467075	0.00286196	0.00416092	0.00804464	0.000283337	0.00664546	0.00104492	0.00162808	0.00156338	19.0629	2.03769	0.61576
Concentration (nM)	15.5691	185.934	0.58751	3.57991	0.190018	3.06895	1.14284	0.0508261	22.9197	2.89663	0.608029	0.116691	0.344748	8.25749	NA	NA	NA	NA	5.69738	NA	5.02972	643.153	NA	7.94797	NA	NA	1.05158	41.0157	4.97279	92.0623
3D_20 ng/ml PMA_HUVECs2_1	0.726991	3.38531	0.00345742	0.411826	0.0380123	0.0309847	0.00978752	0.0107782	0.249234	0.082479	0.0299207	0.0234193	0.0133966	0.00506958	0.00113625	0.0036397	0.0049571	0.00135798	0.00557123	0.00372696	0.0046446	0.0105541	0.000187683	0.00569135	0.00122602	0.00136212	0.00110878	18.6955	2.15838	0.824758
3D_20 ng/ml PMA_HUVECs2_2	0.766587	3.57416	0.00462826	0.417604	0.0374963	0.0288898	0.0118236	0.0107067	0.248262	0.0775354	0.0344616	0.0264137	0.013997	0.00652185	0.00137025	0.00442856	0.0053572	0.00189155	0.00709699	0.00427635	0.00498938	0.0108815	0.000334713		0.000967624	0.0022191		17.0501	1.92598
3D_20 ng/ml PMA_HUVECs2_3	0.876616	4.2472	0.00505656	0.537028	0.0546196	0.0363774	0.0131746	0.0119758	0.30406	0.100272	0.0403043	0.0478519	0.012377	0.00864778	0.0011564	0.00345795	0.00620263	0.00142355	0.00663154	0.00404512	0.00444117	0.00989304	0.000300343	0.00435546	0.000909181	0.00151885	0.00128629	24.6263	2.43775	0.629265
3D_20 ng/ml PMA_HUVECs2_4	0.676339	3.34701	0.00418259	0.396661	0.0415024	0.0287253	0.0101006	0.0111866	0.23419	0.0795191	0.0336638	0.0212271	0.0113715	0.00802354	0.00144378		0.00697056	0.00184753	0.00755746	0.00560588	0.00554199	0.0128548	0.000261219	0.00628108	0.000911116	0.00202851	0.00151842	15.025	1.52963
3D_20 ng/ml PMA_HUVECs2_5	0.761217	3.75913	0.00362166	0.456286	0.0448029	0.0402078	0.0107309	0.0128907	0.266909	0.0917676	0.0418799	0.0343249	0.0135495	0.00879436	0.00135021		0.00551649	0.00165603	0.00619539	0.00355921	0.00483974	0.0109921	0.000350646	0.00528752	0.00127566	0.00170537	0.00118844	17.3175	2.26495	0.822171
3D_20 ng/ml PMA_HUVECs2_6	0.761462	3.66583	0.00453536	0.415511	0.0432598	0.0303102	0.0116209	0.00966838	0.255527	0.0827032	0.03696	0.0264712	0.0154519	0.0074222	0.0012279	0.00425072	0.00495588	0.00182906	0.00576383	0.00344285	0.00504872	0.0102197	0.000365384	0.00630662	0.00117462	0.00224502	0.00230415
Average	0.761535	3.66311	0.00424697	0.439152	0.0432822	0.0325825	0.0112064	0.0112011	0.259697	0.0857127	0.0361984	0.0299513	0.0133573	0.00741322	0.0012808	0.00394423	0.00565998	0.00166762	0.00646941	0.0041094	0.0049176	0.0108992	0.000299998	0.00558441	0.00107737	0.0018465	0.00148122	18.5429	2.06334	0.758731
Concentration (nM)	9.25189	102.076	0.327662	1.94553	0.124796	0.819972	0.741312	0.0320866	12.1611	1.52414	0.375377	0.10763	0.304318	7.36221	NA	NA	NA	NA	7.89138	NA	5.94439	871.37	NA	6.67895	NA	NA	0.99631	39.8968	5.03537	113.438
3D_20 ng/ml PMA_HUVECs3_1	0.728645	3.08392	0.0039974	0.365799	0.0421379	0.0366716	0.0111614	0.0111353	0.229886	0.0780635	0.0301825	0.0233121	0.0150149	0.00775038	0.00118524	0.00331933	0.00400693	0.00107719	0.00430315	0.00286373	0.00373937	0.00815807	0.000184595	0.00362043	0.00121599	0.00169854	0.00159981	18.7612	1.83823	0.565985
3D_20 ng/ml PMA_HUVECs3_2	0.8744	3.49955	0.00437069	0.380071	0.0478618	0.415485	0.0120861	0.0109669	0.241801	0.0810331	0.0298492	0.0193751	0.0151571	0.00804353	0.00123682	0.00370034	0.00435948	0.00144011	0.00519679	0.00251489	0.0047867	0.00830858	0.000429239	0.00635953	0.00126803	0.00220209	0.00199512	23.2935	2.18927	0.691878
3D_20 ng/ml PMA_HUVECs3_3	0.812534	3.13363	0.00453918	0.29663	0.0399792	0.525484	0.0112086	0.00887618	0.219418	0.0762295	0.0295908	0.0209579	0.0166852	0.00885458	0.00109427	0.00385941	0.00501511	0.0015221	0.00618947	0.00296525	0.00446634	0.00875109	0.000363356	0.00494886	0.00101714	0.00186039	0.00217466	21.7596	2.49287	0.632401
3D_20 ng/ml PMA_HUVECs3_4	0.656963	2.60891	0.00285494	0.297956	0.0415213	0.0166115	0.00921356	0.00981857	0.171728	0.0623664	0.0214166	0.0153697	0.0174108	0.00814305	0.000963981	0.00357701	0.00319631	0.001346	0.00369116	0.00238772	0.0039657	0.00773124	0.000246438	0.00543388	0.000941684	0.00180974	0.00250349	28.99	3.38944	0.61245
3D_20 ng/ml PMA_HUVECs3_5	0.729294	3.0258	0.00327212	0.396578	0.0478769	0.0268675	0.0101943	0.0112576	0.241229	0.0840742	0.0308908	0.0234678	0.0160606	0.0076841	0.00090827	0.00362166	0.00313686	0.000924121	0.0040771	0.00240557	0.00345191	0.00723207	0.000207994	0.00579937	0.000621367	0.00165625	0.001828	20.2559	2.28746	0.501905
3D_20 ng/ml PMA_HUVECs3_6	0.719383	2.76808	0.00402319	0.291189	0.0379897	0.155652	0.0102532	0.00730171	0.212777	0.0721208	0.0237972	0.0228151	0.0178164	0.006306	0.00101265	0.00351934	0.00405386	0.00128478	0.00404656	0.00288141	0.0042639	0.00833417	0.00019876	0.00559767	0.00111846	0.00220622	0.00207607	27.897	3.24049	0.748281
Average	0.753537	3.01998	0.00384292	0.338037	0.0428945	0.196129	0.0106862	0.0098927	0.219473	0.0756479	0.0276212	0.020883	0.0163575	0.00779694	0.00106687	0.00359951	0.00396143	0.00126572	0.00458404	0.00266976	0.00411232	0.00808587	0.00027173	0.00529329	0.00103045	0.00190554	0.00202953	23.4929	2.57296	0.625483
Concentration (nM)	9.15472	84.1548	0.296489	1.49757	0.123678	4.93578	0.7069	0.0283386	10.2775	1.34517	0.286432	0.0750429	0.372673	7.7433	NA	NA	NA	NA	5.59161	NA	4.97097	646.449	NA	6.33077	NA	NA				93.516
