# Supplementary material for: Metabolic response of blood vessels to TNFα
Source: eLife. 2020 Aug 4;9:e54754. doi: 10.7554/eLife.54754 (PMC7476757; doi:10.7554/eLife.54754)
Supplement: Table 4—source data 1. [file elife-54754-table4-data1.xlsx]

## Sheet: Source data 3
	Peak Area Ratio (a.u.)
Sample	PGF1a	PGF2a	PGF3a	PGE2	PGE1	PGD2	13_14-dihydro-PGF2a	PGA2	8-iso-13_14-dihydro-PGF2a	8-iso-PGF2a	8-iso-PGE2	8-iso-PGE1	5-iPF2a	LPA C14_0	LPA C16_1	LPA C22_6	LPA C18_2	LPA C20_4	LPA C22_5	LPA C16_0	LPA C18_1	cLPA C20_4	LPA C18_0	cLPA C18_2	cLPA C16_0	cLPA C18_1	cLPA C18_0	S-1-P C18_1	PAF C16:0
Negative control_2D_1	0.296005	1.65235	0.00942941	0.126269	0.00628936	0.0181301	0.12824	0.0480575	0.0315023	0.068856	0.0151939	0.01984	0.0364604	0.0749711	0.206253	0.112546	0.0555985	0.0559906	0.0799602	0.320326	0.142925	0.0148731	0.179758	0.00194019	0.032299	0.0271029	0.0225585	0.0353764	0.158393
Negative control_2D_2	0.243357	1.49581	0.00684127	0.0659714	0.00937145	0.0137478	0.0963883	0.0534716	0.0472524	0	0.00905683	0.0174658	0.0301093	0.0583605	0.180178	0.112063	0.0639425	0.063531	0.0499003	0.28049	0.151233	0.0108654	0.169534	0.00224953	0.0284078	0.0243793	0.0155368	0.0259731	0.105689
Negative control_2D_3	0.287622	1.6673	0.00747874	0.0962068	0.00470822	0.021215	0.124431	0.0485469	0.077396	0	0.0106683	0.0167262	0.0396419	0.053117	0.172783	0.0859148	0.118904	0.139426	0	0.479408	0.220604	0.0170286	0	0	0.0325337	0.032975	0.0185741	0	0.127449
15 ng/ml TNF-α_2D_1	1.10552	5.93518	0.0179287	0.60674	0.0349256	0.0885811	0.205026	0.0901808	0.174799	0.10736	0.0173835	0.0664933	0.0351788	0.0684751	0.0943372	0.134562	0.0451801	0.0905872	0.0957883	0.290053	0.152618	0.00819339	0.115139	0.00170287	0.0216133	0.0169672	0.0117834	0	0.102279
15 ng/ml TNF-α_2D_2	1.08482	6.3375	0.0173283	0.506565	0.0285451	0.094098	0.234341	0.0820776	0.234169	0.163303	0.0110825	0.0666874	0.0629217	0.044496	0.0822067	0.0858048	0.0327204	0.0534622	0.0810739	0.20977	0.112559	0.00954444	0.140494	0.000930439	0.0192087	0.0140775	0.0148782	0.0152617	0.078208
15 ng/ml TNF-α_2D_3	0.887176	5.1252	0.013347	0.390035	0.0214781	0.0804817	0.192314	0.0801007	0.162286	0	0.023384	0.0549175	0.0353222	0.0799756	0.0962775	0.0994762	0.0382606	0.0805278	0.0822032	0.215448	0.108022	0.0091955	0.106947	0.000663676	0.02087	0.0150683	0.0118558	0	0.0881415
Negative control_3D_1	0.0379971	0.727681	0	0.0252175	0.00153602	0	0.0166116	0.0730258	0.022107	0.016947	0.010042	0.0116926	0.00607993	0.0071052	0.0203029	0.017426	0.0170327	0.0204318	0.0153778	0.0687569	0.0517801	0.00128924	0.0195753	0.000414084	0.00246695	0.00249614	0.00250812	0.00101362	0.00595001
Negative control_3D_2	0.0271946	0.450445	0	0.0161785	0.00104272	0	0.0124678	0.0726862	0.0207706	0.0206255	0.00762863	0.0082905	0.00587712	0.00701948	0.0243174	0.0201416	0.0176021	0.0180391	0.0111276	0.0818749	0.0563407	0.00141523	0.0221835	0.000132515	0.00252212	0.00297714	0.00215418	0.00108108	0.00712824
15 ng/ml TNF-α_3D_1	0.432049	3.07693	0.00727359	0.0447647	0.00384595	0.00710902	0.0296017	0.0721991	0.0998777	0.049015	0.0067199	0.043249	0.0043282	0.00315667	0.00903801	0.0164833	0.0076222	0.0138046	0.0101936	0.0430635	0.0273379	0.0014683	0.0151429	0.00025189	0.00205571	0.00411102	0.00283775	0.000496695	0.00440819
15 ng/ml TNF-α_3D_2	0.238907	2.36289	0.00590353	0.0380495	0.00136068	0.0044855	0.0319809	0.0717774	0.0645209	0.0433783	0.00714912	0.0329377	0.00693733	0.00520174	0.0126921	0.0145659	0.00726822	0.0143869	0.0147216	0.0556968	0.0282952	0.000483096	0.00794614	0.000310443	0.00191052	0.00077058	0.00125066	0.00058997	0.00310917
